# Supplementary material
Source: PubMed Central journal article supplement (PMC3208005)
Supplement: 11-8133_z7g999112089st1.pdf [file 11-8133_z7g999112089st1.pdf]

Supplementary Table S1. The raw data of the IOP of perfusion cultured bovine eyes.

| Treatment                                                                     | Eye#   | IOP (mmHg) |       |       |       |       |       |       |      |       |       |       |
|-------------------------------------------------------------------------------|--------|------------|-------|-------|-------|-------|-------|-------|------|-------|-------|-------|
|                                                                               |        | Day 0      | 1     | 2     | 3     | 4     | 5     | 6     | 7    | 8     | mΔIOP |       |
| ETH                                                                           | POC25  | 5.56       | 6.48  | 6.81  | 7.62  | 8.04  |       |       |      |       |       | 2.48  |
| ETH                                                                           | POC27  | 8.11       | 8.14  | 7.93  | 8.08  | 8.38  |       |       |      |       |       | 0.27  |
| ETH                                                                           | POC29  | 3.94       | 4.20  | 4.23  | 4.48  | 4.48  |       |       |      |       |       | 0.54  |
| ETH                                                                           | POC32  | 3.02       | 2.71  | 3.74  | 4.60  |       |       |       |      |       |       | 1.58  |
| ETH                                                                           | POC34  | 2.43       | 2.81  | 3.86  | 4.71  |       |       |       |      |       |       | 2.28  |
| ETH                                                                           | POC36  | 5.71       | 5.46  | 5.74  |       |       |       |       |      |       |       | 0.03  |
| ETH                                                                           | POC38  | 3.33       | 4.03  | 4.31  | 4.33  | 4.45  | 4.48  |       |      |       |       | 1.15  |
| ETH                                                                           | POC40  | 9.14       | 9.72  | 9.46  | 7.27  | 7.92  | 8.23  |       |      |       |       | 0.58  |
| ETH                                                                           | POC44  | 6.32       | 6.33  | 6.59  | 5.91  | 5.76  | 5.66  | 5.60  | 6.00 |       |       | 0.27  |
| ETH                                                                           | POC48  | 8.38       | 8.70  | 9.68  | 9.52  | 9.85  | 9.48  | 8.66  |      |       |       | 1.47  |
| ETH                                                                           | POC56  | 4.21       | 4.09  | 4.03  | 4.25  | 4.31  | 4.08  | 3.75  |      |       |       | 0.10  |
| ETH                                                                           | POC60  | 13.58      | 13.59 | 13.89 | 14.59 | 14.92 | 14.90 | 14.98 |      |       |       | 1.40  |
| ETH                                                                           | POC70  | 5.33       | 5.37  | 5.30  | 3.64  | 5.25  | 5.44  | 5.67  | 5.82 | 5.94  |       | 0.61  |
| ETH                                                                           | POC76  | 4.02       | 4.28  | 4.41  | 4.43  | 4.65  | 4.70  | 4.69  |      |       |       | 0.68  |
| ETH                                                                           | POC83  | 8.06       | 9.41  | 10.15 | 7.40  | 6.49  | 6.39  | 6.42  |      |       |       | 2.08  |
| ETH                                                                           | POC89  | 9.14       | 11.52 | 11.45 | 11.19 | 11.36 | 11.78 |       |      |       |       | 2.64  |
| ETH                                                                           | POC91  | 10.16      | 11.43 | 11.64 | 11.57 | 11.76 | 11.70 |       |      |       |       | 1.60  |
| ETH                                                                           | POC101 | 8.26       | 7.45  | 7.68  | 7.33  | 7.55  | 7.87  | 8.36  | 8.73 | 8.99  |       | 0.73  |
| Basal IOP (IOP on day 0): mean=6.60, SD=2.96, N=18; mΔIOP: mean=1.14, SD=0.84 |        |            |       |       |       |       |       |       |      |       |       |       |
| Responder                                                                     | POC26  | 5.82       | 6.86  | 10.20 | 12.52 | 12.60 |       |       |      |       |       | 6.78  |
| Responder                                                                     | POC39  | 6.36       | 6.44  | 6.16  | 8.41  | 13.71 | 16.76 |       |      |       |       | 10.40 |
| Responder                                                                     | POC41  | 2.56       | 3.77  | 5.00  | 5.46  | 5.40  | 5.36  |       |      |       |       | 2.90  |
| Responder                                                                     | POC64  | 7.40       | 7.07  | 8.74  | 9.95  | 12.80 | 15.53 |       |      |       |       | 8.13  |
| Responder                                                                     | POC68  | 2.43       | 2.80  | 3.07  | 4.55  | 6.50  | 6.66  | 6.49  |      |       |       | 4.23  |
| Responder                                                                     | POC71  | 6.60       | 5.04  | 6.35  | 4.14  | 6.68  | 9.57  | 10.10 | 9.98 | 10.29 |       | 3.69  |

|                                                                |        |       |       |       |       |       |       |       |       |       |       |
|----------------------------------------------------------------|--------|-------|-------|-------|-------|-------|-------|-------|-------|-------|-------|
| Responder                                                      | POC72  | 2.44  | 2.90  | 2.38  | 1.34  | 2.86  | 5.43  | 8.12  | 9.75  | 10.66 | 8.22  |
| Responder                                                      | POC77  | 3.78  | 7.14  | 6.99  | 6.09  | 5.63  | 4.89  | 3.81  |       |       | 3.36  |
| Responder                                                      | POC82  | 5.47  | 9.48  | 8.52  | 6.67  | 6.17  | 5.90  | 5.73  |       |       | 4.02  |
| Responder                                                      | POC90  | 7.64  | 9.55  | 10.02 | 10.05 | 10.55 | 10.80 |       |       |       | 3.16  |
| Responder                                                      | POC92  | 9.47  | 12.17 | 13.42 | 13.37 | 13.37 | 13.18 |       |       |       | 3.94  |
| Responder                                                      | POC102 | 10.16 | 9.95  | 10.65 | 10.62 | 11.24 | 11.70 | 12.50 | 13.18 | 13.78 | 3.62  |
| Basal IOP: mean=5.84, SD=2.64, N=12; mΔIOP: mean=5.20, SD=2.50 |        |       |       |       |       |       |       |       |       |       |       |
| Non-responder                                                  | POC28  | 5.70  | 5.66  | 5.79  | 6.22  | 6.93  |       |       |       |       | 1.23  |
| Non-responder                                                  | POC30  | 3.63  | 3.55  | 3.57  | 4.31  | 5.14  |       |       |       |       | 1.51  |
| Non-responder                                                  | POC31  | 5.88  | 6.74  | 6.98  | 7.07  | 6.87  |       |       |       |       | 1.19  |
| Non-responder                                                  | POC33  | 4.75  | 4.86  | 6.34  | 7.13  |       |       |       |       |       | 2.38  |
| Non-responder                                                  | POC35  | 6.54  | 5.59  | 6.01  | 5.92  |       |       |       |       |       | 0.00* |
| Non-responder                                                  | POC37  | 4.44  | 3.07  | 2.26  | 2.05  |       |       |       |       |       | 0.00* |
| Non-responder                                                  | POC42  | 5.45  | 5.34  | 5.64  | 4.94  | 4.67  | 4.65  | 4.74  | 4.69  |       | 0.19  |
| Non-responder                                                  | POC49  | 9.61  | 9.44  | 10.40 | 9.05  | 9.94  | 10.79 | 10.83 | 6.79  |       | 1.22  |
| Non-responder                                                  | POC57  | 8.46  | 8.54  | 8.66  | 9.28  | 10.04 | 10.13 | 10.15 |       |       | 1.69  |
| Non-responder                                                  | POC58  | 11.21 | 9.73  | 8.55  | 10.51 | 12.59 | 13.15 | 9.57  |       |       | 1.94  |
| Non-responder                                                  | POC61  | 6.55  | 5.11  | 5.11  | 5.27  | 5.32  | 5.78  | 6.57  |       |       | 0.02  |
| Non-responder                                                  | POC66  | 7.79  | 7.50  | 9.14  | 10.02 | 10.17 | 10.53 |       |       |       | 2.74  |
| Non-responder                                                  | POC67  | 4.11  | 4.38  | 5.20  | 6.13  | 6.16  | 5.51  | 4.87  |       |       | 2.05  |
| Non-responder                                                  | POC74  | 5.69  | 5.11  | 5.43  | 4.25  | 5.58  | 5.92  | 6.30  | 6.26  | 6.33  | 0.63  |

|               |       |      |      |      |      |      |      |      |      |
|---------------|-------|------|------|------|------|------|------|------|------|
| Non-responder | POC78 | 2.66 | 2.84 | 3.62 | 4.16 | 4.55 | 4.52 | 4.76 | 2.10 |
| Non-responder | POC80 | 5.85 | 5.52 | 6.67 | 6.85 | 7.05 | 7.22 | 8.21 | 2.36 |
| Non-responder | POC84 | 1.64 | 2.19 | 3.15 | 2.18 | 1.85 | 2.07 | 2.21 | 1.51 |

Basal IOP: mean=5.88, SD=2.42, N=17; mΔIOP: mean=1.34, SD=0.90

---

The mean, SD and SEM of basal IOP of all forty-seven eyes are 6.14, 2.66 and 0.39mmHg, respectively. \*: negative ΔIOP was set at 0.
