# Supplementary material
Source: PubMed Central journal article supplement (PMC3208005)
Supplement: 11-8133_z7g999112089st2.pdf [file 11-8133_z7g999112089st2.pdf]

Supplementary Table S2. The raw data of the outflow facility of perfusion cultured bovine eyes.

| Treatment                                                                                                              | Eye#   | Outflow facility ( $\mu\text{l}/\text{min}/\text{mmHg}$ ) |      |      |      |      |      |      |      |      |                    |       |
|------------------------------------------------------------------------------------------------------------------------|--------|-----------------------------------------------------------|------|------|------|------|------|------|------|------|--------------------|-------|
|                                                                                                                        |        | Day 0                                                     | 1    | 2    | 3    | 4    | 5    | 6    | 7    | 8    | m $\Delta\text{C}$ |       |
| ETH                                                                                                                    | POC25  | 0.90                                                      | 0.77 | 0.73 | 0.66 | 0.62 |      |      |      |      |                    | -0.28 |
| ETH                                                                                                                    | POC27  | 0.62                                                      | 0.61 | 0.63 | 0.62 | 0.60 |      |      |      |      |                    | -0.02 |
| ETH                                                                                                                    | POC29  | 1.27                                                      | 1.19 | 1.18 | 1.12 | 1.12 |      |      |      |      |                    | -0.15 |
| ETH                                                                                                                    | POC32  | 1.66                                                      | 1.85 | 1.34 | 1.09 |      |      |      |      |      |                    | -0.57 |
| ETH                                                                                                                    | POC34  | 2.06                                                      | 1.78 | 1.30 | 1.06 |      |      |      |      |      |                    | -1.00 |
| ETH                                                                                                                    | POC36  | 0.88                                                      | 0.92 | 0.87 |      |      |      |      |      |      |                    | 0.00  |
| ETH                                                                                                                    | POC38  | 1.50                                                      | 1.24 | 1.16 | 1.15 | 1.12 | 1.12 |      |      |      |                    | -0.38 |
| ETH                                                                                                                    | POC40  | 0.55                                                      | 0.51 | 0.53 | 0.69 | 0.63 | 0.61 |      |      |      |                    | -0.03 |
| ETH                                                                                                                    | POC44  | 0.79                                                      | 0.79 | 0.76 | 0.85 | 0.87 | 0.88 | 0.89 | 0.83 |      |                    | -0.03 |
| ETH                                                                                                                    | POC48  | 0.60                                                      | 0.57 | 0.52 | 0.53 | 0.51 | 0.53 | 0.58 |      |      |                    | -0.09 |
| ETH                                                                                                                    | POC56  | 1.19                                                      | 1.22 | 1.24 | 1.18 | 1.16 | 1.22 | 1.33 |      |      |                    | -0.03 |
| ETH                                                                                                                    | POC60  | 0.37                                                      | 0.37 | 0.36 | 0.34 | 0.34 | 0.34 | 0.33 |      |      |                    | -0.03 |
| ETH                                                                                                                    | POC70  | 0.94                                                      | 0.93 | 0.94 | 1.37 | 0.95 | 0.92 | 0.88 | 0.86 | 0.84 |                    | -0.10 |
| ETH                                                                                                                    | POC76  | 1.25                                                      | 1.17 | 1.13 | 1.13 | 1.07 | 1.06 | 1.07 |      |      |                    | -0.18 |
| ETH                                                                                                                    | POC83  | 0.62                                                      | 0.53 | 0.49 | 0.68 | 0.77 | 0.78 | 0.78 |      |      |                    | -0.13 |
| ETH                                                                                                                    | POC89  | 0.55                                                      | 0.43 | 0.44 | 0.45 | 0.44 | 0.42 |      |      |      |                    | -0.12 |
| ETH                                                                                                                    | POC91  | 0.49                                                      | 0.44 | 0.43 | 0.43 | 0.43 | 0.43 |      |      |      |                    | -0.07 |
| ETH                                                                                                                    | POC101 | 0.61                                                      | 0.67 | 0.65 | 0.68 | 0.66 | 0.63 | 0.60 | 0.57 | 0.56 |                    | -0.05 |
| Basal outflow facility (outflow facility on day 0): mean=0.93, SD=0.46, N=18; m $\Delta\text{C}$ : mean=-0.18, SD=0.25 |        |                                                           |      |      |      |      |      |      |      |      |                    |       |
| Responder                                                                                                              | POC26  | 0.86                                                      | 0.73 | 0.49 | 0.40 | 0.40 |      |      |      |      |                    | -0.46 |
| Responder                                                                                                              | POC39  | 0.79                                                      | 0.78 | 0.81 | 0.59 | 0.36 | 0.30 |      |      |      |                    | -0.49 |
| Responder                                                                                                              | POC41  | 1.95                                                      | 1.33 | 1.00 | 0.92 | 0.93 | 0.93 |      |      |      |                    | -1.04 |
| Responder                                                                                                              | POC64  | 0.68                                                      | 0.71 | 0.57 | 0.50 | 0.39 | 0.32 |      |      |      |                    | -0.35 |
| Responder                                                                                                              | POC68  | 2.05                                                      | 1.79 | 1.63 | 1.10 | 0.77 | 0.75 | 0.77 |      |      |                    | -1.30 |
| Responder                                                                                                              | POC71  | 0.76                                                      | 0.99 | 0.79 | 1.21 | 0.75 | 0.52 | 0.49 | 0.50 | 0.49 |                    | -0.27 |

|           |        |      |      |      |      |      |      |      |      |      |       |
|-----------|--------|------|------|------|------|------|------|------|------|------|-------|
| Responder | POC72  | 2.05 | 1.72 | 2.10 | 3.72 | 1.75 | 0.92 | 0.62 | 0.51 | 0.47 | -1.58 |
| Responder | POC77  | 1.32 | 0.70 | 0.71 | 0.82 | 0.89 | 1.02 | 1.31 |      |      | -0.62 |
| Responder | POC82  | 0.91 | 0.53 | 0.59 | 0.75 | 0.81 | 0.85 | 0.87 |      |      | -0.39 |
| Responder | POC90  | 0.65 | 0.52 | 0.50 | 0.50 | 0.47 | 0.46 |      |      |      | -0.19 |
| Responder | POC92  | 0.53 | 0.41 | 0.37 | 0.37 | 0.37 | 0.38 |      |      |      | -0.16 |
| Responder | POC102 | 0.49 | 0.50 | 0.47 | 0.47 | 0.44 | 0.43 | 0.40 | 0.38 | 0.36 | -0.13 |

Basal outflow facility: mean=1.09, SD=0.60, N=12; mΔC: mean=-0.58, SD=0.47

|               |       |      |      |      |      |      |      |      |      |      |       |
|---------------|-------|------|------|------|------|------|------|------|------|------|-------|
| Non-responder | POC28 | 0.88 | 0.88 | 0.86 | 0.80 | 0.72 |      |      |      |      | -0.16 |
| Non-responder | POC30 | 1.38 | 1.41 | 1.40 | 1.16 | 0.97 |      |      |      |      | -0.41 |
| Non-responder | POC31 | 0.85 | 0.74 | 0.72 | 0.71 | 0.73 |      |      |      |      | -0.14 |
| Non-responder | POC33 | 1.05 | 1.03 | 0.79 | 0.70 |      |      |      |      |      | -0.35 |
| Non-responder | POC35 | 0.76 | 0.89 | 0.83 | 0.84 |      |      |      |      |      | 0.00* |
| Non-responder | POC37 | 1.13 | 1.63 | 2.21 | 2.44 |      |      |      |      |      | 0.00* |
| Non-responder | POC42 | 0.92 | 0.94 | 0.89 | 1.01 | 1.07 | 1.07 | 1.05 | 1.07 |      | -0.03 |
| Non-responder | POC49 | 0.52 | 0.53 | 0.48 | 0.55 | 0.50 | 0.46 | 0.46 | 0.74 |      | -0.06 |
| Non-responder | POC57 | 0.59 | 0.59 | 0.58 | 0.54 | 0.50 | 0.49 | 0.49 |      |      | -0.10 |
| Non-responder | POC58 | 0.45 | 0.51 | 0.58 | 0.48 | 0.40 | 0.38 | 0.52 |      |      | -0.07 |
| Non-responder | POC61 | 0.76 | 0.98 | 0.98 | 0.95 | 0.94 | 0.86 | 0.76 |      |      | 0.00  |
| Non-responder | POC66 | 0.64 | 0.67 | 0.55 | 0.50 | 0.49 | 0.48 |      |      |      | -0.17 |
| Non-responder | POC67 | 1.22 | 1.14 | 0.96 | 0.82 | 0.81 | 0.91 | 1.03 |      |      | -0.40 |
| Non-responder | POC74 | 0.88 | 0.98 | 0.92 | 1.18 | 0.90 | 0.85 | 0.79 | 0.80 | 0.79 | -0.09 |

|               |       |      |      |      |      |      |      |      |       |
|---------------|-------|------|------|------|------|------|------|------|-------|
| Non-responder | POC78 | 1.88 | 1.76 | 1.38 | 1.20 | 1.10 | 1.11 | 1.05 | -0.83 |
| Non-responder | POC80 | 0.85 | 0.91 | 0.75 | 0.73 | 0.71 | 0.69 | 0.61 | -0.25 |
| Non-responder | POC84 | 3.06 | 2.28 | 1.59 | 2.29 | 2.70 | 2.42 | 2.26 | -1.47 |

Basal outflow facility: mean=1.05, SD=0.62, N=17; mΔC: mean=-0.27, SD=0.38

---

The mean, SD and SEM of the basal outflow facility of all forty-seven eyes are 1.01, 0.55 and 0.08μl/min/mmHg, respectively. \*: positive mΔC was set at 0.
